# Supplementary material for: CAD/CAM Abutments in the Esthetic Zone: A Systematic Review and Meta-Analysis of Soft Tissue Stability
Source: MDPI journal article supplement (doi:10.3390/jcm12113847), 2023-06-04
Supplement: s1 [file s1]

Supplementary Table S1: Databases and search items.

| Databases                                      | Keywords                                                                                                                                                                                                                                                                                                                                                                                                                                                                                                                                                                                               |
|------------------------------------------------|--------------------------------------------------------------------------------------------------------------------------------------------------------------------------------------------------------------------------------------------------------------------------------------------------------------------------------------------------------------------------------------------------------------------------------------------------------------------------------------------------------------------------------------------------------------------------------------------------------|
| PubMed                                         | (anterior OR esthetic ) AND (abutment OR dental implant OR zirconia OR titanium abutment OR CAD/CAM abutment OR custom abutment) AND (gingival margin OR papilla OR soft tissue stability OR gingival recession)                                                                                                                                                                                                                                                                                                                                                                                       |
| Embase                                         | ((anterior OR esthetic) AND ('implant'/exp OR implant) AND abutment OR 'titanium'/exp OR titanium OR 'zirconium oxide'/exp OR 'zirconium oxide') AND ('dental'/exp OR dental) AND ('implant'/exp OR implant) AND ('computer aided design/computer aided manufacturing'/exp OR 'computer aided design/computer aided manufacturing')                                                                                                                                                                                                                                                                    |
| Cochrane Central Register of Controlled Trials | (((dental AND implants OR (dental AND abutment) OR (dental AND 'implant abutment' AND design) OR (dental AND prosthesis, AND 'implant supported')) AND 'computer aided' AND design OR ('computer assisted' AND design) OR ('computer aided' AND manufacturing) OR 'cad cam' OR (zirconia AND abutment) OR (zirconia AND dental AND abutment) OR (custom AND abutment)) AND stock AND abutment OR (titanium AND abutment) OR (zirconia AND abutment)) AND pink AND esthetic AND score OR papilla OR (soft AND tissue AND stability) OR (gingival AND recession) OR ('peri implant' AND soft AND tissue) |

Supplementary Table S2: Reasons of exclusions.

| Study                      | Reason of exclusion                                                       |
|----------------------------|---------------------------------------------------------------------------|
| Joda et al. [26] 2015      | the aim of the study was incoherent with the aim of the Systematic review |
| Joda et al. [27] 2015      | the aim of the study was incoherent with the aim of the Systematic review |
| Joda et al. [28] 2016      | the aim of the study was incoherent with the aim of the Systematic review |
| Joda et al. [29] 2016      | the aim of the study was incoherent with the aim of the Systematic review |
| Wittneben et al. [36] 2020 | overlapping data, same cohort of Wittneben 2017                           |
| Costa et al. [30] 2021     | the aim of the study was incoherent with the aim of the Systematic review |
| Rathe et al. [31] 2021     | the aim of the study was incoherent with the aim of the Systematic review |
| Fonseca et al. [37] 2021   | study design inconsistent with inclusion criteria                         |
| Donker et al. [32] 2022    | the aim of the study was incoherent with the aim of the Systematic review |
| Wehner et al. [33] 2022    | the aim of the study was incoherent with the aim of the Systematic review |
| Hsu et al. [34] 2022       | the aim of the study was incoherent with the aim of the Systematic review |
| Lin et al. [16] 2022       | the aim of the study was incoherent with the aim of the Systematic review |
| Tartea et al. [35] 2023    | the aim of the study was incoherent with the aim of the Systematic review |
